# Supplementary material for: Elucidating the genetic basis of social interaction and isolation
Source: PubMed Central journal article supplement (PMC6030100; doi:10.1038/s41467-018-04930-1), 2018-07-03
Supplement: 41467_2018_4930_MOESM1_ESM.pdf [file 41467_2018_4930_MOESM1_ESM.pdf]

**“Elucidating the genetic basis of social interaction and isolation”**

**Day *et al***

Supplementary Table 1 - LDSC-SEG GTEx enrichment

| Name                                    | Loneliness P | Pub P    | Sport P  | Religious |
|-----------------------------------------|--------------|----------|----------|-----------|
| Brain Cerebellum                        | 3.16E-03     | 3.93E-04 | 3.62E-02 | 1.64E-03  |
| Brain Cerebellar Hemisphere             | 5.08E-03     | 2.54E-03 | 7.37E-02 | 4.83E-04  |
| Brain Putamen (basal ganglia)           | 7.66E-03     | 8.80E-03 | 5.61E-04 | 2.48E-03  |
| Brain Cortex                            | 8.43E-03     | 2.55E-03 | 2.24E-02 | 7.77E-06  |
| Brain Anterior cingulate cortex (BA24)  | 1.03E-02     | 1.61E-03 | 1.45E-02 | 1.08E-04  |
| Brain Frontal Cortex (BA9)              | 1.61E-02     | 4.67E-03 | 1.77E-02 | 6.17E-06  |
| Brain Caudate (basal ganglia)           | 1.71E-02     | 4.62E-04 | 1.29E-03 | 1.82E-03  |
| Brain Hippocampus                       | 1.73E-02     | 9.02E-03 | 1.69E-02 | 8.86E-03  |
| Brain Substantia nigra                  | 1.74E-02     | 1.12E-03 | 9.06E-02 | 3.62E-04  |
| Brain Nucleus accumbens (basal ganglia) | 2.18E-02     | 5.97E-04 | 1.28E-03 | 3.13E-04  |
| Brain Hypothalamus                      | 2.67E-02     | 2.83E-04 | 1.58E-02 | 7.56E-04  |
| Brain Amygdala                          | 7.94E-02     | 1.74E-04 | 7.79E-02 | 1.70E-03  |
| Spleen                                  | 1.08E-01     | 6.06E-01 | 4.69E-01 | 2.51E-01  |
| Ovary                                   | 1.45E-01     | 6.97E-01 | 9.94E-01 | 3.03E-01  |
| Brain Spinal cord (cervical c-1)        | 1.80E-01     | 1.69E-03 | 4.50E-02 | 1.48E-02  |
| Adrenal Gland                           | 2.17E-01     | 7.14E-01 | 9.87E-01 | 7.89E-01  |
| Thyroid                                 | 2.31E-01     | 9.98E-01 | 8.72E-01 | 7.60E-01  |
| Small Intestine Terminal Ileum          | 2.34E-01     | 6.31E-01 | 9.85E-01 | 8.42E-01  |
| Prostate                                | 2.69E-01     | 6.62E-01 | 9.92E-01 | 4.77E-01  |
| Stomach                                 | 3.82E-01     | 1.56E-01 | 9.98E-01 | 7.14E-01  |
| Colon Transverse                        | 3.89E-01     | 7.79E-01 | 5.36E-01 | 6.48E-01  |
| Bladder                                 | 3.91E-01     | 9.83E-01 | 9.95E-01 | 9.05E-01  |
| Pituitary                               | 4.30E-01     | 3.99E-01 | 7.56E-01 | 2.03E-02  |
| Vagina                                  | 4.45E-01     | 9.97E-01 | 6.04E-01 | 1.62E-01  |
| Esophagus Muscularis                    | 5.69E-01     | 7.80E-01 | 9.62E-01 | 5.05E-01  |
| Esophagus Mucosa                        | 5.94E-01     | 8.57E-01 | 6.89E-01 | 6.28E-01  |
| Uterus                                  | 6.17E-01     | 8.43E-01 | 5.96E-02 | 4.31E-01  |
| Minor Salivary Gland                    | 6.30E-01     | 9.53E-01 | 9.52E-01 | 9.01E-01  |
| Testis                                  | 6.32E-01     | 2.73E-01 | 5.49E-01 | 1.05E-01  |
| Cervix Ectocervix                       | 6.33E-01     | 9.97E-01 | 9.85E-01 | 7.40E-01  |
| Muscle Skeletal                         | 6.42E-01     | 8.30E-02 | 8.83E-01 | 9.28E-02  |
| Cells EBV-transformed lymphocytes       | 6.44E-01     | 4.75E-01 | 3.96E-01 | 1.05E-01  |
| Heart Left Ventricle                    | 7.30E-01     | 6.50E-01 | 6.24E-01 | 4.42E-01  |
| Colon Sigmoid                           | 7.46E-01     | 8.52E-01 | 4.61E-01 | 8.11E-01  |
| Nerve Tibial                            | 7.51E-01     | 2.29E-01 | 7.63E-01 | 7.02E-01  |
| Cervix Endocervix                       | 7.68E-01     | 8.52E-01 | 9.98E-01 | 4.56E-01  |
| Esophagus Gastroesophageal Junction     | 7.76E-01     | 5.60E-01 | 8.97E-01 | 5.53E-01  |
| Heart Atrial Appendage                  | 7.80E-01     | 5.51E-01 | 8.24E-01 | 9.71E-01  |
| Lung                                    | 7.90E-01     | 6.10E-01 | 9.65E-01 | 9.70E-01  |
| Kidney Cortex                           | 8.11E-01     | 4.64E-01 | 9.97E-01 | 9.10E-01  |
| Skin Not Sun Exposed (Suprapubic)       | 8.21E-01     | 9.99E-01 | 9.48E-01 | 6.77E-01  |
| Liver                                   | 8.55E-01     | 2.28E-01 | 9.98E-01 | 4.10E-01  |
| Skin Sun Exposed (Lower leg)            | 8.76E-01     | 9.93E-01 | 8.09E-01 | 4.09E-01  |
| Fallopian Tube                          | 9.05E-01     | 6.69E-01 | 8.19E-01 | 9.44E-01  |
| Whole Blood                             | 9.09E-01     | 7.76E-01 | 9.86E-01 | 4.93E-01  |
| Adipose Visceral (Omentum)              | 9.59E-01     | 8.70E-01 | 4.24E-01 | 1.00E+00  |
| Artery Aorta                            | 9.75E-01     | 8.10E-01 | 8.20E-01 | 9.13E-01  |
| Breast Mammary Tissue                   | 9.78E-01     | 9.90E-01 | 8.39E-01 | 8.04E-01  |
| Artery Tibial                           | 9.85E-01     | 7.57E-01 | 8.24E-01 | 5.65E-01  |
| Adipose Subcutaneous                    | 9.85E-01     | 8.34E-01 | 8.00E-01 | 9.65E-01  |
| Cells Transformed fibroblasts           | 9.87E-01     | 3.45E-01 | 8.80E-01 | 9.89E-01  |
| Pancreas                                | 9.89E-01     | 4.94E-01 | 9.82E-01 | 9.54E-01  |
| Artery Coronary                         | 9.99E-01     | 9.85E-01 | 2.76E-01 | 8.62E-01  |

Supplementary Table 2 - Phenotypic distribution

| Attend a Pub or Social Club | Attend Sports activity | Attend Religious groups | Percentage of total (%) | Loneliness |         |       |
|-----------------------------|------------------------|-------------------------|-------------------------|------------|---------|-------|
|                             |                        |                         |                         | Yes        | No      | % Yes |
| Yes                         | Yes                    | Yes                     | 0.8                     | 537        | 3,111   | 17.3  |
|                             |                        | No                      | 7.8                     | 5,141      | 29,432  | 17.5  |
|                             | No                     | Yes                     | 1.7                     | 1,298      | 6,320   | 20.5  |
|                             |                        | No                      | 17.2                    | 14,149     | 62,208  | 22.7  |
| No                          | Yes                    | Yes                     | 3.3                     | 2,106      | 12,657  | 16.6  |
|                             |                        | No                      | 18.1                    | 12,534     | 67,814  | 18.5  |
|                             | No                     | Yes                     | 8.8                     | 6,604      | 32,601  | 20.3  |
|                             |                        | No                      | 42.4                    | 37,765     | 150,747 | 25.1  |

Supplementary Table 3 - Phenotypic associations

| Social group                  | Odds ratio for Loneliness | Standard Error       | 95% CI      | p-value                |
|-------------------------------|---------------------------|----------------------|-------------|------------------------|
| Pub or Social Club (raw)      | 0.93                      | $7.9 \times 10^{-3}$ | 0.92 – 0.95 | $3.8 \times 10^{-17}$  |
| Pub or Social Club (adjusted) | 1.00                      | $8.8 \times 10^{-3}$ | 0.99 – 1.02 | 0.76                   |
| Sports group (raw)            | 0.75                      | $6.4 \times 10^{-3}$ | 0.74 – 0.76 | $3.9 \times 10^{-243}$ |
| Sports group (adjusted)       | 0.73                      | $6.3 \times 10^{-3}$ | 0.71 – 0.74 | $4.6 \times 10^{-298}$ |
| Religious group (raw)         | 0.87                      | $9.5 \times 10^{-3}$ | 0.85 – 0.88 | $1.7 \times 10^{-39}$  |
| Religious group (adjusted)    | 0.85                      | $9.5 \times 10^{-3}$ | 0.83 – 0.87 | $2.2 \times 10^{-47}$  |

The adjusted model is adjusted for age and sex, as well as attendance at the other two social groups.

Supplementary Table 4 – Genetic correlations between phenotypes relating to social contact.

| Trait 1            | Trait 2            | rG     | SE    | z     | p        |
|--------------------|--------------------|--------|-------|-------|----------|
| Lonely             | Pub or social club | 0.0085 | 0.034 | 0.25  | 0.80     |
| Lonely             | Religious group    | -0.284 | 0.036 | -8.00 | 1.20E-15 |
| Lonely             | Sports group       | -0.314 | 0.032 | -9.95 | 2.53E-23 |
| Pub or social club | Religious group    | -0.347 | 0.037 | -9.29 | 1.57E-20 |
| Pub or social club | Sports group       | 0.079  | 0.033 | 2.39  | 0.02     |
| Religious group    | Sports group       | 0.306  | 0.032 | 9.52  | 1.77E-21 |
